# Supplementary material for: Facile synthesis of food-grade and size-controlled nanocarriers based on self-assembly of procyanidins and phycocyanin
Source: Royal Society of Chemistry journal article supplement (doi:10.1039/d1fo04222j), 2022-01-01
Supplement: d1fo04222j1.pdf [file d1fo04222j1.pdf]

**Facile synthesis of food-grade and size-controlled nanocarriers based on self-assembly of procyanidins and phycocyanin**

Shanshan Tie<sup>abc</sup>, Siyuan Xiang<sup>abc</sup>, Yannan Chen<sup>abc</sup>, Fengzhi Qiao<sup>abc</sup>, Weina Cui<sup>abc</sup>,  
Wentao Su<sup>abc</sup>, and Mingqian Tan<sup>abc\*</sup>

<sup>a</sup>*Academy of Food Interdisciplinary Science, School of Food Science and Technology,  
Dalian Polytechnic University, Qinggongyuan1, Ganjingzi District, Dalian 116034,  
Liaoning, China*

<sup>b</sup>*National Engineering Research Center of Seafood, Dalian Polytechnic University,  
Dalian 116034, Liaoning, China*

<sup>c</sup>*Collaborative Innovation Center of Seafood Deep Processing, Dalian Polytechnic  
University, Dalian 116034, Liaoning, China*

\*Corresponding author.

Mingqian Tan

Tel: +86-411-86318657

Fax: +86-411-86318657

E-mail: [mqtan@dlpu.edu.cn](mailto:mqtan@dlpu.edu.cn)

Table S1. Different concentrations of procyanidins, vanillin and phycocyanin for the fabrication of nanocarriers named NC-1~NC-8.

| <b>Sample name</b> | <b>Procyanidins (mg/mL)</b> | <b>Vanillin (mg/mL)</b> | <b>Phycocyanin (mg/mL)</b> | <b>Size (nm)</b> | <b>Polydispersity index (PDI)</b> |
|--------------------|-----------------------------|-------------------------|----------------------------|------------------|-----------------------------------|
| NC-1               | 1.00                        | 0.57                    | 0.20                       | 255              | 0.44                              |
| NC-2               | 5.00                        | 0.57                    | 0.20                       | 208              | 0.48                              |
| NC-3               | 7.50                        | 0.57                    | 0.20                       | 479              | 0.37                              |
| NC-4               | 5.00                        | 0.19                    | 0.20                       | 405              | 0.56                              |
| NC-5               | 5.00                        | 0.29                    | 0.20                       | 283              | 0.48                              |
| NC-6               | 5.00                        | 0.76                    | 0.20                       | 745              | 0.54                              |
| NC-7               | 5.00                        | 0.57                    | 0.10                       | 665              | 0.55                              |
| NC-8               | 5.00                        | 0.57                    | 0.50                       | 138              | 0.42                              |

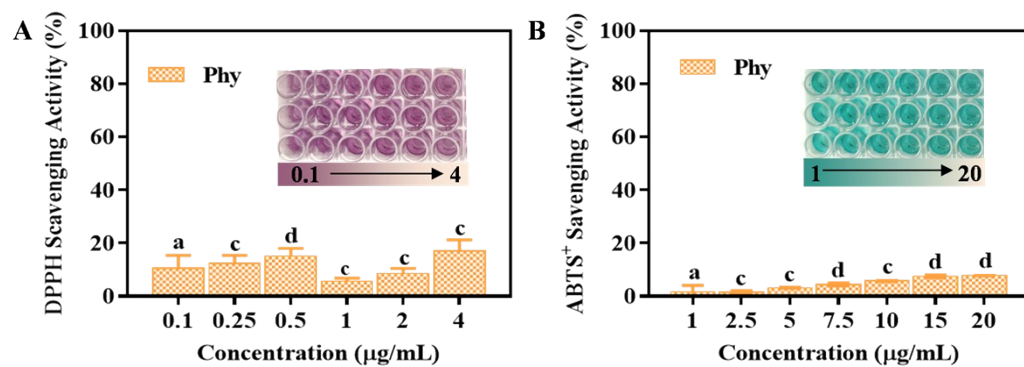

Figure S1. The optical images and histograms of (A) DPPH and (B) ABTS radical scavenging ability of phycocyanin (Phy). Different letters indicate significant differences ( $p < 0.05$ ) within different samples at the same concentration.

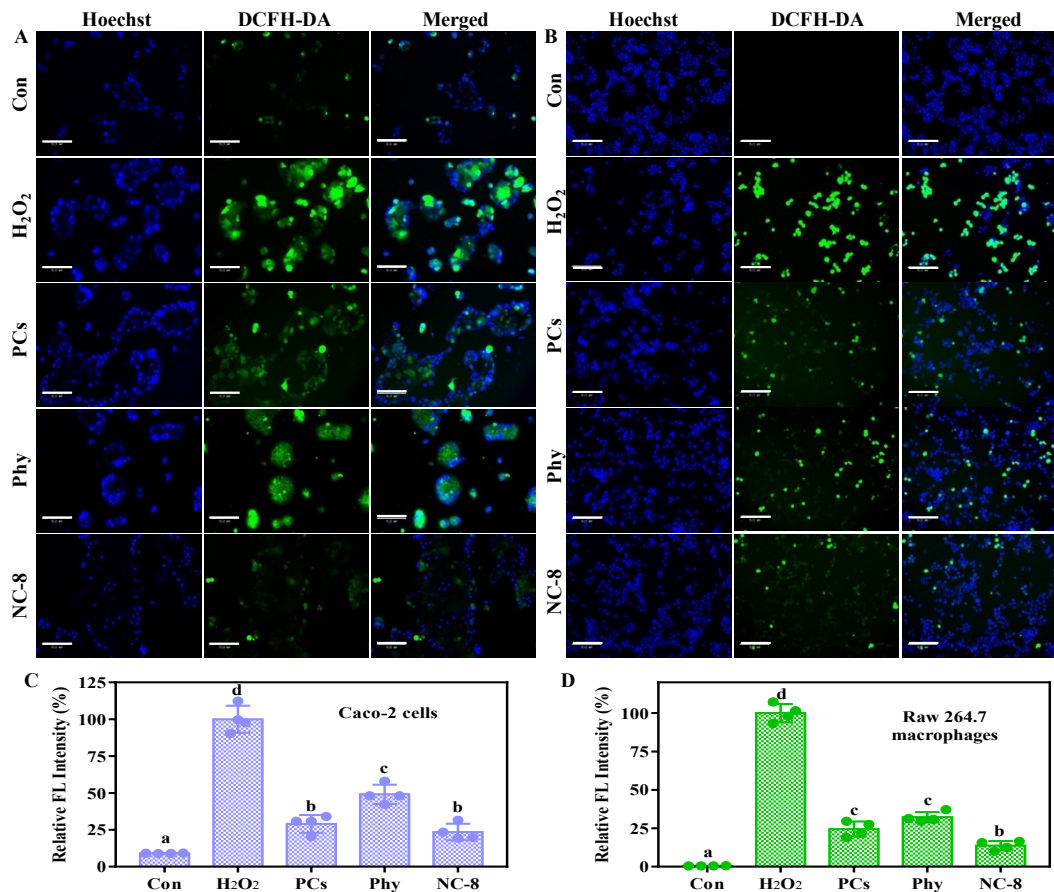

Figure S2. Effect of nanocarriers on reactive oxygen species production in cells induced by H<sub>2</sub>O<sub>2</sub>. Fluorescent images of H<sub>2</sub>O<sub>2</sub>-treated (A) Caco-2 cells and (B) RAW 264.7 macrophages stained with DCFH-DA. Scale bar = 130  $\mu$ m. Relative fluorescent intensity of different treatment groups in (C) Caco-2 cells and (D) RAW 264.7 macrophages. Different letters indicate significant difference ( $p < 0.05$ ).

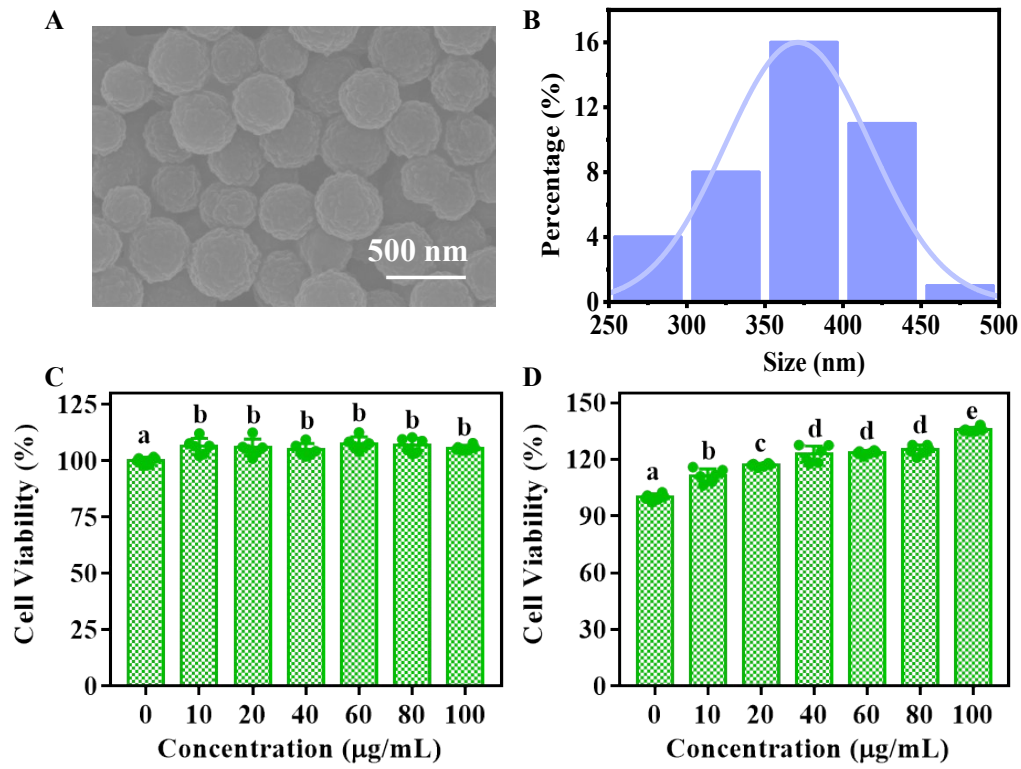

Figure S3. Characterization of lutein/NC-8 nanoparticles. (A) SEM image and (B) size distribution histogram of lutein/NC-8 nanoparticles. Cell viability of (C) lutein and (D) lutein/NC-8 nanoparticles in HCEC cells evaluated by MTT assay. Different letters indicate significant difference ( $p < 0.05$ ).
